# Supplementary material
Source: Springer Nature journal article supplement (https://www.springermedizin.de/resource/supplementary/12957_2012_1126_MOESM4_ESM.pdf/9561836)

Case 5

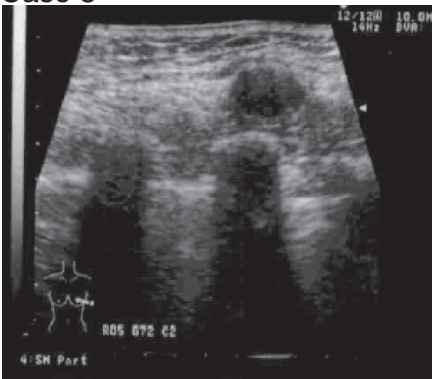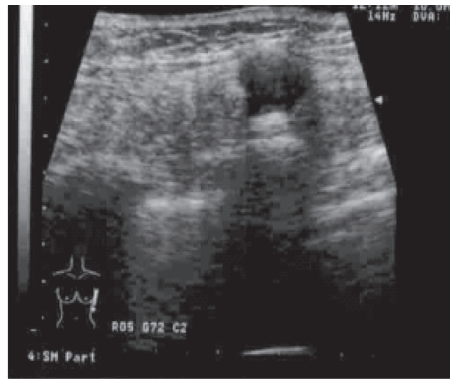

a

Case 6

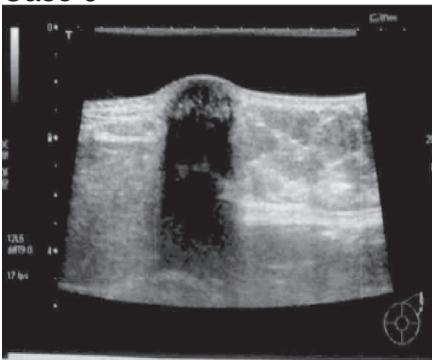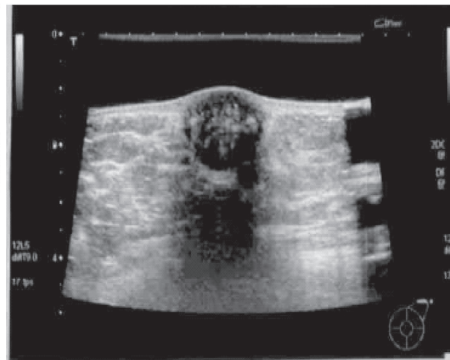

b

Supplement: MOESM4 [file 9561836]
